# Supplementary material
Source: MDPI journal article supplement (https://www.mdpi.com/2410-3888/8/1/28)
Supplement: s1 [file s1]

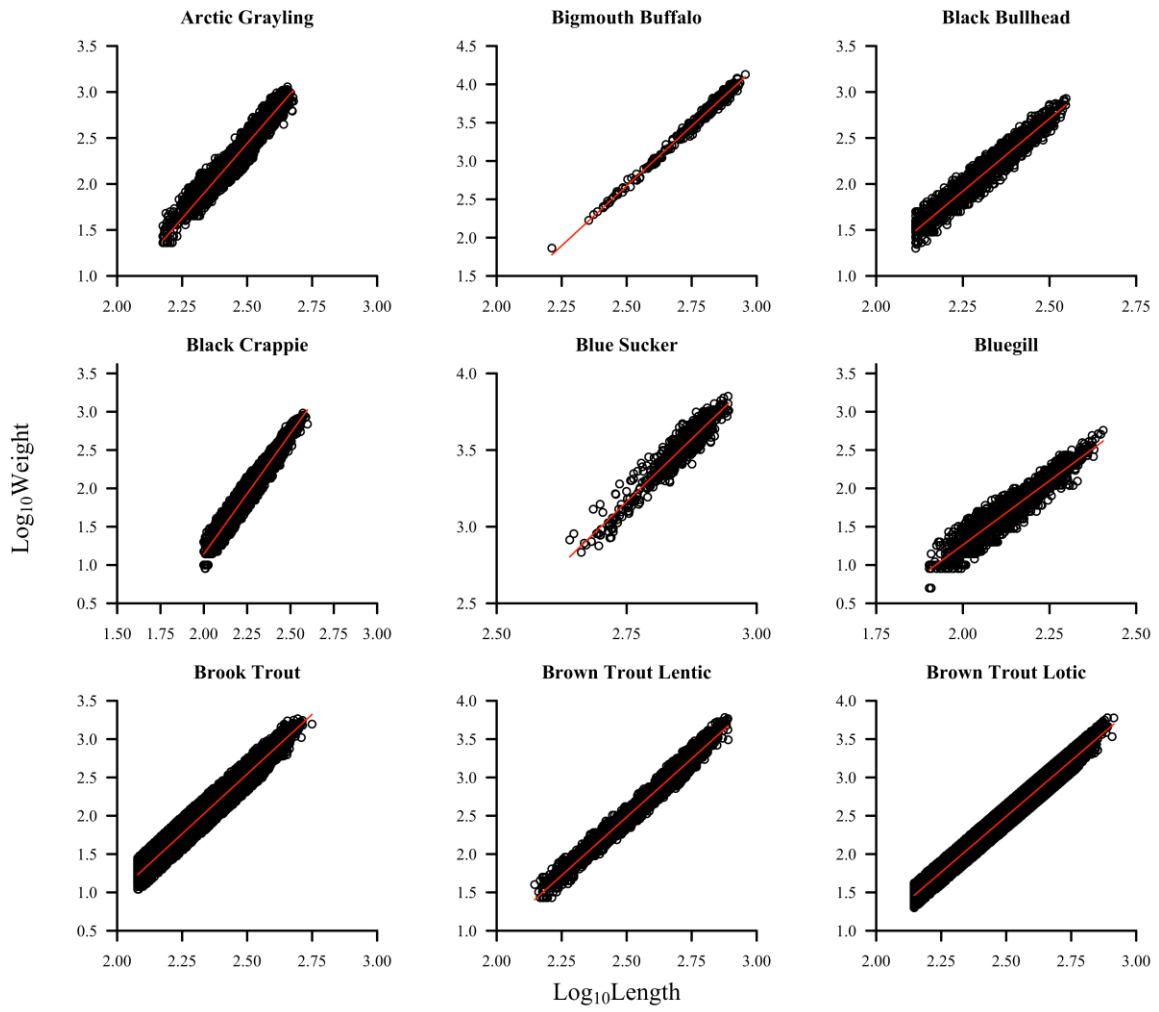

Figure S1: Scatter plot of  $\log_{10}$ weight– $\log_{10}$ length for arctic grayling, bigmouth buffalo, black bullhead, black crappie, blue sucker, bluegill, brook trout, and brown trout where we propose  $W'$  parameters. Red line represents average fish in Montana as predicted from a Bayesian linear regression.

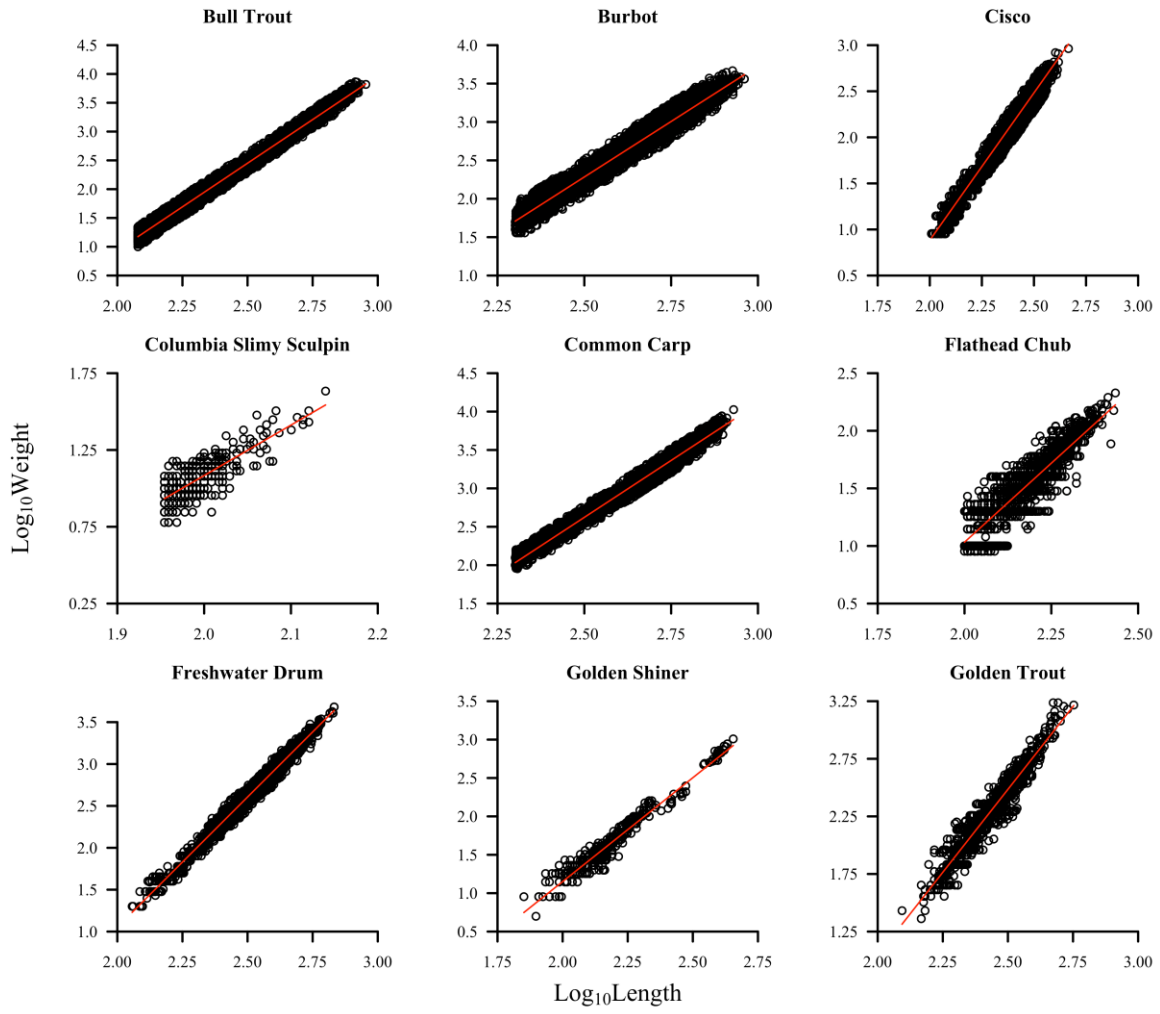

Figure S2: Scatter plot of  $\log_{10}$ weight– $\log_{10}$ length for bull trout, burbot, cisco, Columbia slimy sculpin, common carp, flathead chub, freshwater drum, golden shiner, and golden trout where we propose  $W'$  parameters. Red line represents average fish in Montana as predicted from a Bayesian linear regression.

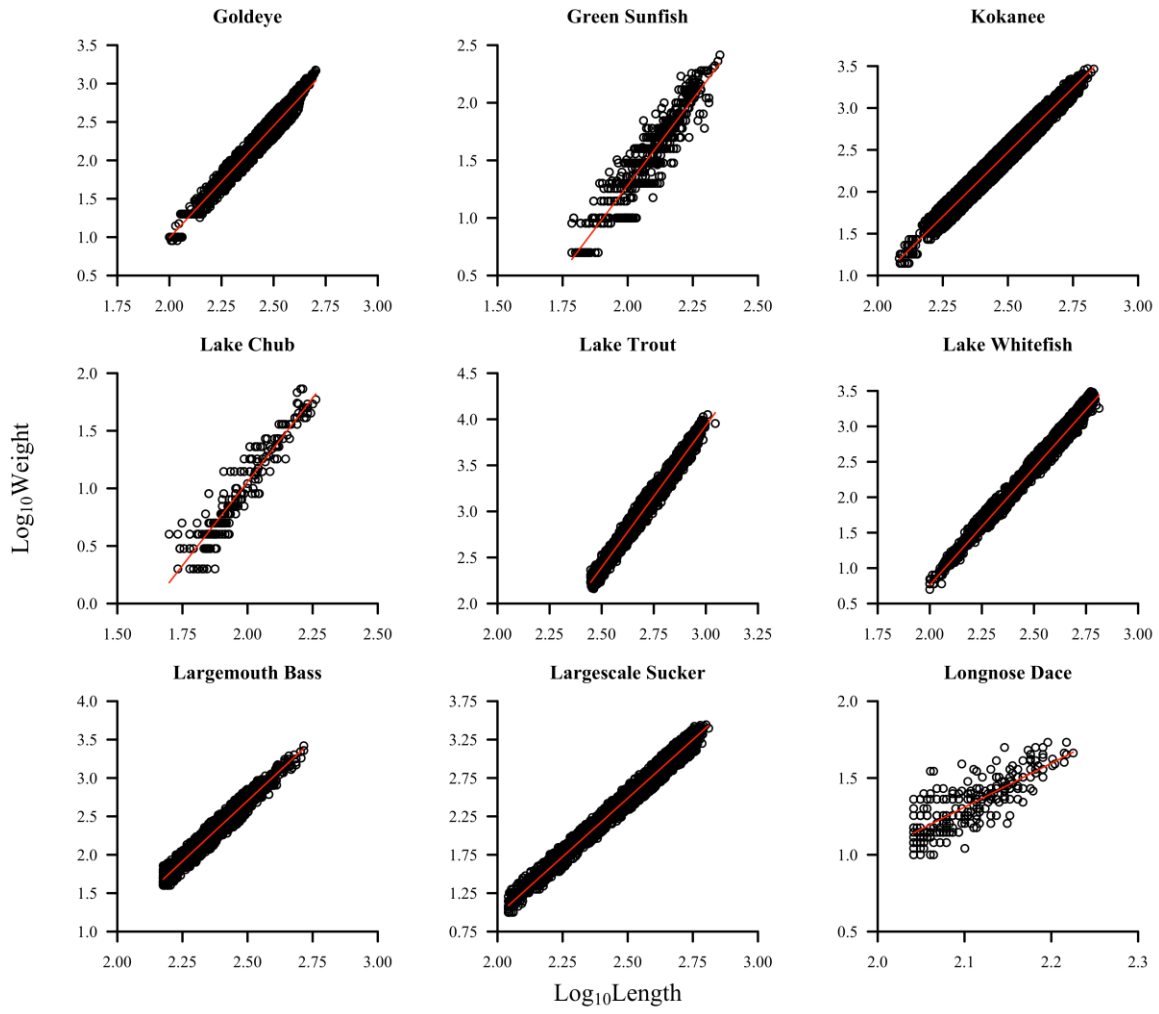

Figure S3: Scatter plot of  $\log_{10}$ weight– $\log_{10}$ length for goldeye, green sunfish, kokanee, lake chub, lake trout, lake whitefish, largemouth bass, largemouth sucker, and longnose dace where we propose  $W'$  parameters. Red line represents average fish in Montana as predicted from a Bayesian linear regression.

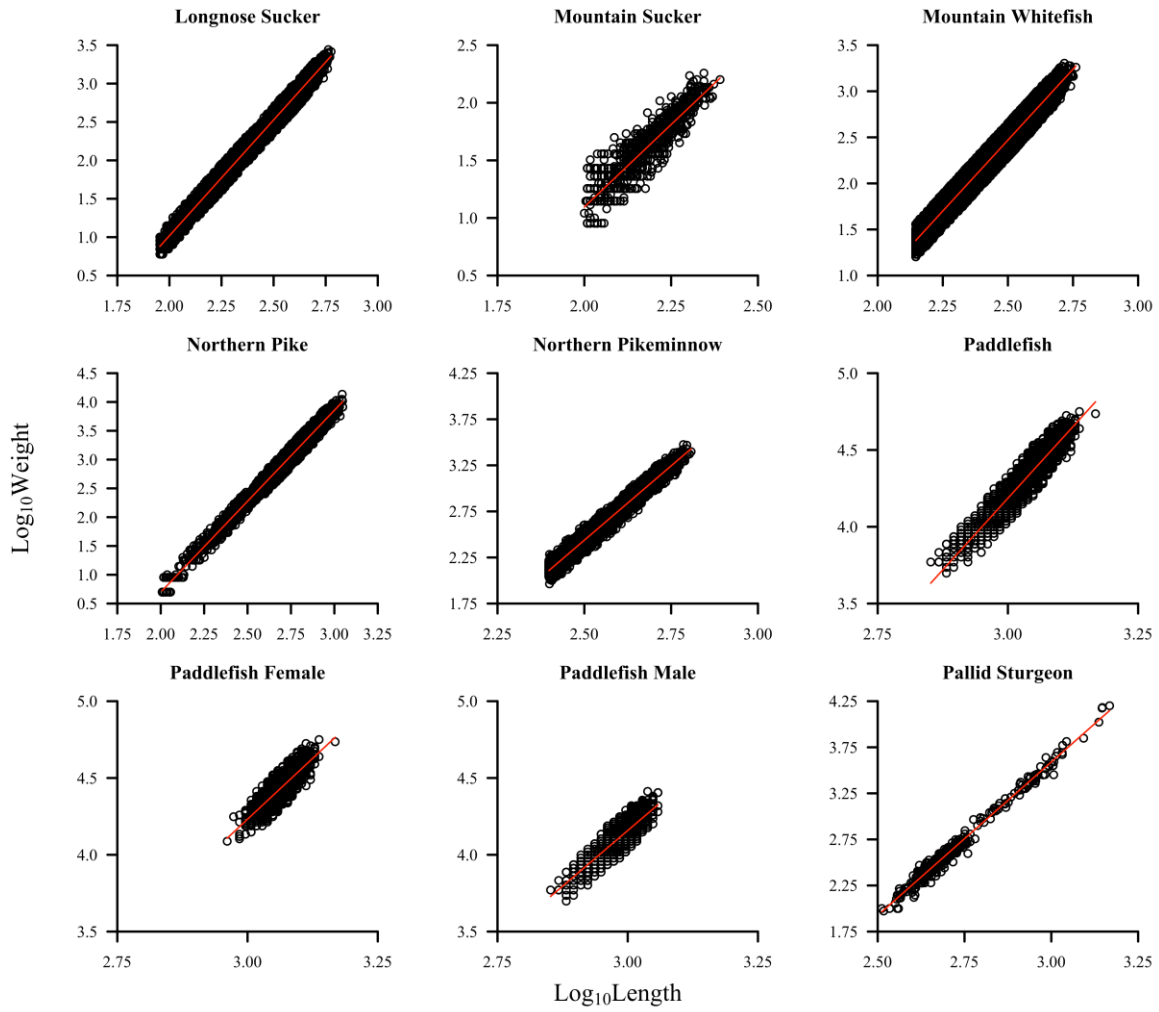

Figure S4: Scatter plot of  $\log_{10}$ weight– $\log_{10}$ length for longnose sucker, mountain sucker, mountain whitefish, northern pike, northern pikeminnow, paddlefish, and pallid sturgeon where we propose  $W'$  parameters. Red line represents average fish in Montana as predicted from a Bayesian linear regression.

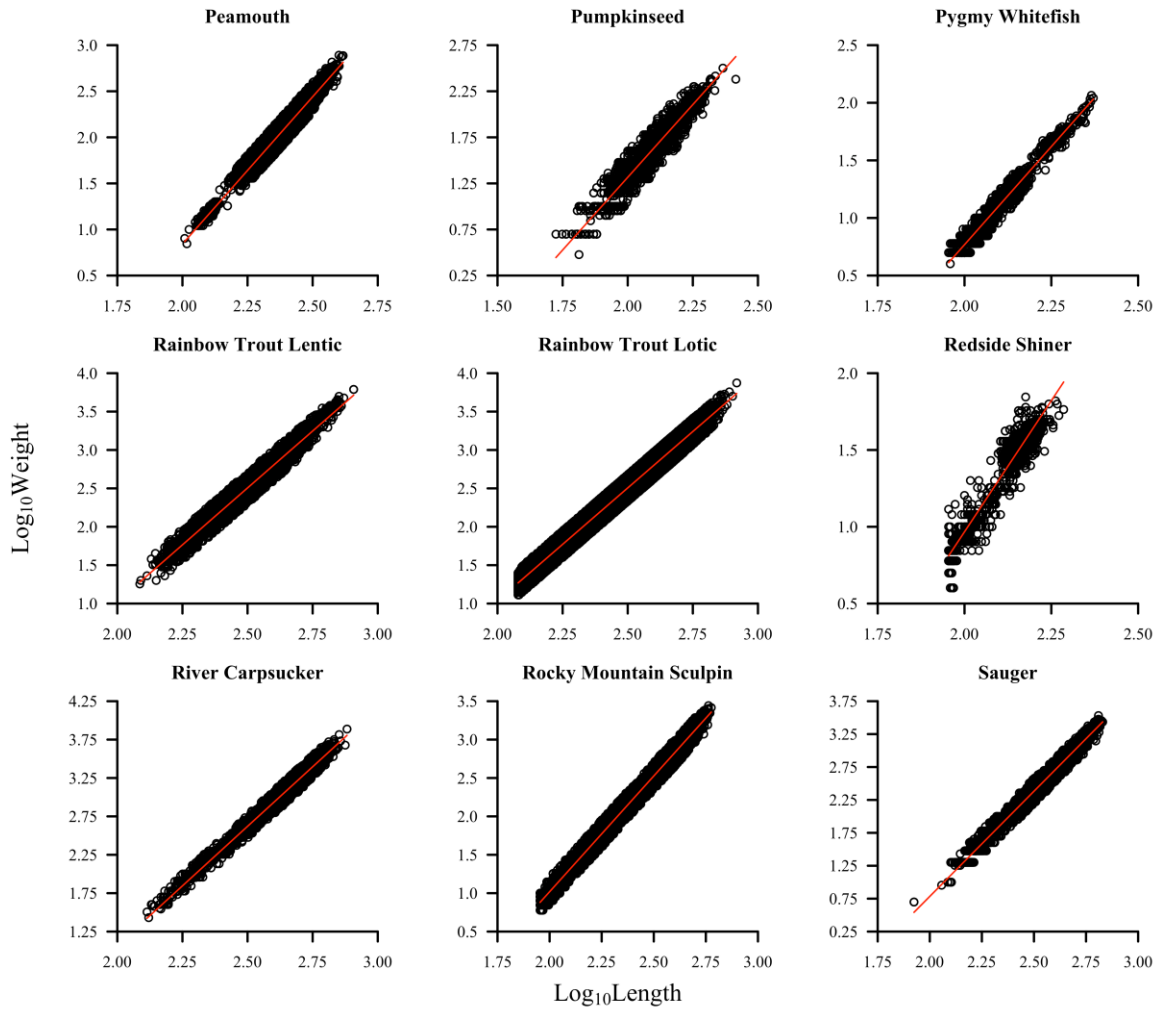

Figure S5: Scatter plot of  $\log_{10}$ weight– $\log_{10}$ length for peamouth, pumpkinseed, pygmy whitefish, rainbow trout, redside shiner, river carpsucker, rocky mountain sculpin, and sauger where we propose  $W'$  parameters. Red line represents average fish in Montana as predicted from a Bayesian linear regression.

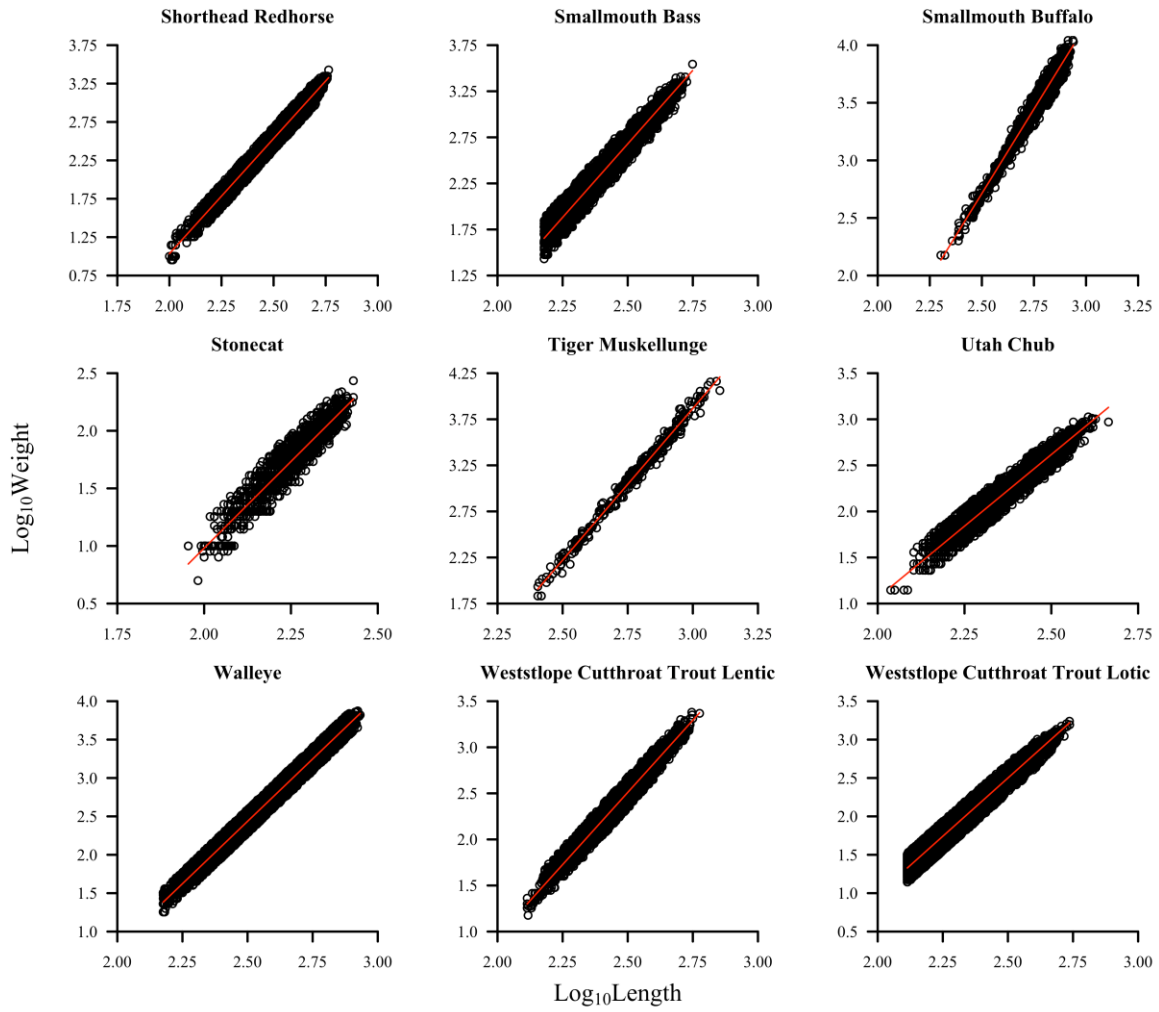

Figure S6: Scatter plot of  $\log_{10}$ weight– $\log_{10}$ length for shorthead redhorse, smallmouth bass, smallmouth buffalo, stonecat, tiger muskellunge, Utah chub, walleye, and westslope cutthroat trout where we propose  $W'$  parameters. Red line represents average fish in Montana as predicted from a Bayesian linear regression.

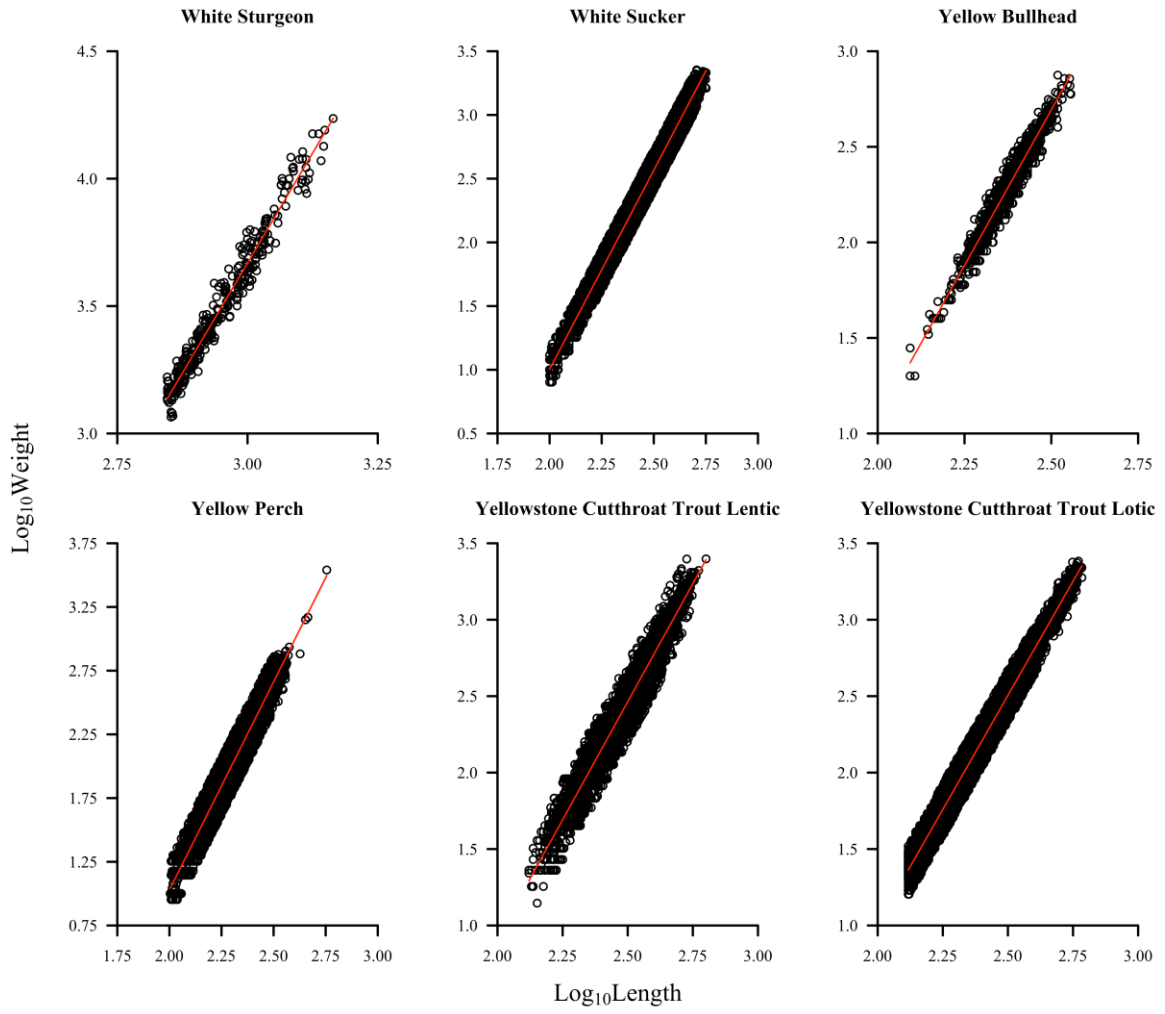

Figure S7: Scatter plot of  $\log_{10}$ weight– $\log_{10}$ length for white sturgeon, white sucker, yellow bullhead, yellow perch, and Yellowstone cutthroat trout where we propose  $W'$  parameters. Red line represents average fish in Montana as predicted from a Bayesian linear regression.
